# Supplementary material for: Spatially Controlled Activation of Toll-like Receptor 9 with DNA-Based Nanomaterials
Source: PubMed Central journal article supplement — Nano Lett. 2022 Mar 10;22(6):2506–13. doi: 10.1021/acs.nanolett.2c00275 (PMC8949768; doi:10.1021/acs.nanolett.2c00275), 2022-03-10
Supplement: nl2c00275_si_001.pdf [file nl2c00275_si_001.pdf]

# SUPPORTING INFORMATION

## Spatially Controlled Activation of Toll-Like Receptor 9 with DNA-Based Nanomaterials

*Alice Comberlato<sup>1</sup>, Marianna M. Koga<sup>1</sup>, Simone Nüssing<sup>2,3</sup>, Ian A. Parish<sup>2,3</sup>,*

*Maartje M.C. Bastings<sup>1,4,\*</sup>*

1 Programmable Biomaterials Laboratory, Institute of Materials, School of Engineering, Ecole Polytechnique  
Fédérale Lausanne, Lausanne, 1015, Switzerland

2 Peter MacCallum Cancer Centre, Melbourne, Victoria 3000, Australia

3 Sir Peter MacCallum Department of Oncology, The University of Melbourne, Parkville, Victoria 3052, Australia.

4 Interfaculty Bioengineering Institute, School of Engineering, Ecole Polytechnique Fédérale Lausanne, Lausanne,  
1015, Switzerland.

## MATERIALS AND METHODS

**Removal of LPS from DNA origami scaffold.** To avoid non-specific cell activation, endotoxin contaminants (e.g. LPS) in the scaffold p7560 solution (Tilibit) were removed with Triton X-114 (Sigma Aldrich) following a previously described protocol.<sup>1</sup> Triton X-114 (2% v/v) was mixed with scaffold stock at 4°C for 30 min to solubilize LPS, mixed at 37°C for 5 min at 450 rpm and centrifuged at 37°C for 30 min at 15000 rpm to induce phase separation and recover the purified scaffold in the upper aqueous phase. The procedure was repeated four times and LPS amount was assessed to be lower than 0.5 EU m/L using the ToxinSensor Chromogenic LAL Endotoxin Assay Kit (GenScript) following the manufacturer's protocol. Purified scaffold was stored at -20°C.

**DNA origami self-assembly and CpG- and Cy5- functionalization.** Unmodified, Cy5- and CpG-functionalized DNA oligonucleotides were purchased from Integrated DNA Technologies (IDT). CpG-ODN 1826 sequence, specific for murine TLR9 and mouse cell lines like the RAW 264.7, was used both for free and disk-conjugated studies. The DNA origami disk structure<sup>2</sup> self-assembly was performed mixing LPS-purified scaffold p7560 (10 nM, Table S1), core folding staples and 6 Cy5-conjugated staples (100 nM and 30 nM, respectively, Table S2), variable extra folding staples and CpG-functionalized staples if needed (100 nM and 50 nM, respectively), in combinations according to the desired structure (see Table S3 for staple sequences corresponding to each structure type) in 1X folding buffer (FoB: 5 mM Tris, 1 mM EDTA, 5 mM NaCl, 20 mM MgCl<sub>2</sub>, pH 8.0, stock solutions purchased from Thermo Fisher). Thermal annealing ramp: 80 °C for 5 min, from 60 °C to 20 °C in steps of -1 °C per hour and stored at 20 °C.

**DNA origami disk purification.** Disks were purified from the excess of staples by PEG precipitation, as previously described.<sup>3</sup> DNA origami annealing solution was mixed in ratio 1:1 v/v with PEG precipitation buffer 2X, containing 15% PEG 8000 (VWR), 0.5 M NaCl in 1X disk folding buffer, incubated at room temperature for 30 min and centrifuged at 16000 rcf for 40 min at 20°C. The supernatant was removed, 1X disk folding buffer added, and the solution was incubated at room temperature overnight. Concentration was measured by absorbance at 260 nm using a microvolume spectrophotometer (Quawell Q9000). Purified structures were stored at 4°C.

**Analytical agarose gel electrophoresis.** Folding and purification quality was assessed by agarose gel electrophoresis (AGE). 10 µl of origami solution at 2.5 nM concentration were mixed with 2 µl of 6X loading dye (Thermo Fisher) and subjected to AGE (2% agarose, 1X TBE, 15 mM MgCl<sub>2</sub>, 1X SybrSafe) at 70 V for 100 min in ice-water bath. Ladder 1kB (N3232L) was purchased from Biolabs. The gels were imaged using a BioRad ChemiDoc MP.

**Stability assays.** To assess the stability of the DNA origami in cell medium used for this study, disks were incubated in DMEM+ at 37°C for a total of 5 h in a total volume of 10 µl at 2.5 nM concentration. Similarly, to confirm the stability at pH 5.5 as in the late endosome, disks were incubated in MES Buffer (pH 5.5, Thermo Fisher) at 37°C for a total of 5 h in a total volume of 10 µl at 2.5 nM concentration. To verify the integrity of DNA origami disk, after incubation, 6X loading dye was added and samples were immediately loaded on agarose gel (2% agarose, 1X TBE, 15 mM MgCl<sub>2</sub>, 1X SybrSafe, run at 70 V for 90 min in ice-water bath). The gels were imaged using a BioRad ChemiDoc MP.

**Transmission Electron Microscopy imaging.** 3 µl of purified DNA origami at 10 nM concentration were adsorbed on carbon grid and incubated for 2 min. The solution in excess was removed and 5 µl of 2% uranyl formate were added immediately on the grid for 30 seconds. Finally, the solution was removed, and the grid was air dried for 15 min. Images were obtained on a Tecnai T12 transmission electron microscope operated at a voltage of 100 kV.

**Cell culture.** RAW 264.7 cells were obtained from the European Collection of Authenticated Cell Cultures (ECACC). Cells were cultured in DMEM high glucose with L-glutamine and sodium pyruvate (Gibco) supplemented with 10% heat-inactivated fetal bovine serum (Gibco), and 100 U/ml Penicillin-Streptomycin (BioConcept) and were detached using ROTI-Cell PBS/EDTA (Carl Roth). Cells were kept at maximum 70% confluence and cultured at 37°C in a 5% CO<sub>2</sub> atmosphere. All experiments were performed with cells between passage 20 and 23.

**RAW 264.7 TLR9 knock out cell line generation using recombinant CRISPR Cas9.** The Tlr9 gene was deleted in RAW 264.7 cells as reported previously for primary T cells<sup>4</sup> with the following alterations: cells were electroporated with pulse DS136, with a complex of Alt-R S.p. Cas9 Nuclease (IDT) and sgRNA (GAUGCUGCCGCAGAGAAACG) targeting Tlr9 (Synthego)

using the SF cell line 4D-Nucleofector X kit S electroporation kit (Lonza) and Lonza 4D-Nucleofector Core Unit. Cells were rested in SAFC media plus 10% FCS at 37°C for 10 min, after which cells were plated out in tissue culture flasks containing 10% FCS SAFC for further expansion. For confirmation of successful Tlr9 deletion, expanded cells were stained intracellularly for TLR9 expression using the eBioscience Foxp3 transcription factor staining kit and anti-mouse TLR9-PE antibody.

***Uptake study by confocal microscope.*** Cells were seeded on ibidi 12-well chamber slides at density of 20'000 cells per well and incubated overnight in the incubator at 37°C with 5% CO<sub>2</sub>. Cy5-labelled DNA origami samples were diluted in DMEM supplemented with 20 mM MgCl<sub>2</sub> (DMEM+) at final concentration of 5 nM immediately before addition to the cells (100 µl per well) and incubated for 30 min at 37°C. To remove structures on the cell surface, the solution was removed and DNase I diluted in complete cell medium (100 µl at final concentration of 70 U/ml, as previously reported<sup>5</sup>) was added to cells and incubated at 37°C for 30 min. For controls, the solution was changed with fresh complete cell medium. At the end of the incubation, the medium was removed, cells were washed with PBS and fixed with 4% paraformaldehyde in PBS (75 µl, incubating 20 min at room temperature). After washing again with PBS, for intracellular staining, cells were permeabilized incubating with 100 µl of 0.1% Triton X-100 (Thermo Fisher) solution in PBS for 10 min at room temperature. After washing with PBS, 100 µl of blocking buffer (5% BSA in PBS) were added and the slide incubated 1 h at room temperature. After removing the blocking solution, for late endosome staining, anti-RAB7 antibody (ab126712, abcam) was diluted 1:500 in 5% BSA in PBS, 100 µl per well added to the cells and the slide incubated overnight at 4°C. After washing with PBS, the secondary antibody goat anti-rabbit AF488 (ab150077, abcam) was added diluted 1:1000 in PBS at 100 µl per well and the slide incubated 1 h at room temperature. After washing with PBS, cells were stained with DAPI solution (50 µl, 300 nM, Thermo Fisher) for 3 min. After two last washes, all the solution was removed from the slide, slide plastic wells were removed and the glass was left to air dry at room temperature for 15 min. ProLong Glass Antifade Mountant (3 drops, Thermo Fisher) was added on the slide, which was immediately covered with a coverslip and left to air-dry at room temperature for 24 h before analysis. Samples were imaged using the confocal microscope Zeiss LSM700 Upright with an oil-immersion objective (Zeiss, Plan-apochromat, 63X, NA 1.40, oil). 405 nm, 488 nm and 639 nm wavelength lasers were used for DAPI, AF488 and Cy5 signals,

respectively. BP 445/50, 515-565 and 690/50 filters were applied for DAPI, AF488 and Cy5 emissions, respectively, and imaged with an AxioCam MRm (B/W). Image analysis was performed with the software ImageJ.

**Flow cytometry.** Cells were seeded on a tissue-culture-treated 96 well plate at 30'000 cells per well and incubated overnight at 37°C with 5% CO<sub>2</sub>. Cy5-labelled DNA origami samples were tested at 0.5 nM concentration, diluted in DMEM+ immediately before addition to the cells (50 µl per well) and incubated for 30 min at 37°C. Similarly, free CpG (CpG-ODN 1826 sequence, IDT) was diluted at the different concentrations in DMEM+ immediately before addition to the cells (50 µl per well) and incubated for 30 min at 37°C. To remove structures on the cell surface at the end of the incubation, the medium was removed and 50 µl of DNase I diluted in complete cell medium was added (at final concentration of 70 U/ml, as previously reported), and cells were incubated at 37°C for 30 min. Subsequently, the solution was replaced with fresh complete medium, and cells were incubated for additional 4 h to induce the expression of surface markers. At the end of the incubation, cells were detached with detaching buffer, resuspended in Flow Cytometry Staining (FACS) Buffer (R&D), and transferred to V-bottom plates. Cells were then centrifuged at 1500 rpm for 3 min and washed with cold PBS (Thermo Fisher), followed by LiveDead Fixable Blue Dead Cell staining (Thermo Fisher) according to the manufacturer's protocol (diluted 1:500 in PBS, 50 µl per well, incubation 20 min at 4°C). After washing with FACS Buffer, cells were resuspended in 50 µl of anti-mouse CD16/32 antibody solution (Biolegend, cat. 101302) diluted 1:100 in FACS Buffer and incubated 15 min at 4°C for Fc receptor blocking. Cells were then centrifuged at 1500 rpm for 3 min, supernatant discarded, and cells were incubated with the antibody mix for surface marker staining (50 µl per well, incubated 30 min at 4°C). The antibody mix was composed of PE-CD40 (Biolegend, cat. 124610) and BV711-CD83 (BD Reagents, cat. 563136) diluted 1:200 in FACS Buffer. After washing with FACS Buffer, cells were fixed with 4% paraformaldehyde in PBS (Alfa Aesar) and stored at 4°C. Cells were analyzed in LSRII SORP flow cytometer (BD), and data processing was done using FACS Diva (BD) and FlowJo (Tree Star). MFI values were reported normalized to the corresponding controls, as reported in each figure, to compare biological replicates.

**ELISA.** Cells were seeded on a tissue-culture-treated 96 well plate at 30'000 cells per well and incubated overnight at 37°C with 5% CO<sub>2</sub> and 95% humidity. The same Cy5-labelled DNA

origami samples used for flow cytometry were tested at 0.5 nM concentration, diluted in DMEM+ immediately before addition to the cells (50  $\mu$ l per well) and incubated for 5 h at 37°C. Similarly, free CpG (CpG-ODN 1826, IDT) was diluted at the different concentrations in DMEM+ immediately before addition to the cells (50  $\mu$ l per well) and incubated for 5 h at 37°C. At the end of the incubation, cell culture supernatant was collected and stored at -80°C until the analysis. IL-6 was measured and quantified with a standard curve using the commercial kit DuoSet ELISA mouse IL-6 (R&D, cat. DY406) according to manufacturer's instruction. IL-6 values of the control were subtracted, and data reported as increase in pg/ml to compare biological replicates.

***Statistical analysis.*** Results are presented as mean values  $\pm$  standard deviation of three independent experiments, with three technical triplicates each. Statistical analyses were determined by the one-way ANOVA test or two-tailed Student's t-test, using GraphPad Prism software (\* $p \leq 0.05$ ; \*\* $P \leq 0.01$ ; \*\*\* $P \leq 0.001$ ).

## SUPPLEMENTARY TEXT

To exclude artifacts, the flow cytometry markers were quantified in the live cell population, gated using a LiveDead stain. Additionally, for disk samples, markers were analyzed in a restricted population of Cy5-positive live cells (“Cy5 gate”) to ensure we measured the activation level among samples in cells with a comparable number of disks per cell (gating strategy reported in Figure S3). To further confirm that differential activation was not induced by variance in uptake of different types of CpG-disks, we measured the median fluorescence intensity (MFI) of cells incubated with the Cy5-labelled CpG-disks and we did not observe significant differences in uptake levels among samples (Figure S4). While we did not observe any significant activation induced by the control DNA disk, we further excluded any possible background signal by normalizing CpG-disks data to cells incubated with empty disk. Moreover, APCs can easily be activated by foreign materials regardless of the TLR9 pathway. Therefore, we confirmed the biocompatibility of all DNA structures to exclude the observation of activation differences as a result of different toxicity levels among samples (Figure S5).

Similarly, to confirm that differential activation was not induced by uneven uptake among samples with different linkers (Figure 4), we ensured that no significant differences in the Cy5 MFI of cells incubated with CpG-disks were observed (Figure S4) and the previously reported gating strategy was applied (Figure S3).

## SUPPLEMENTARY FIGURES

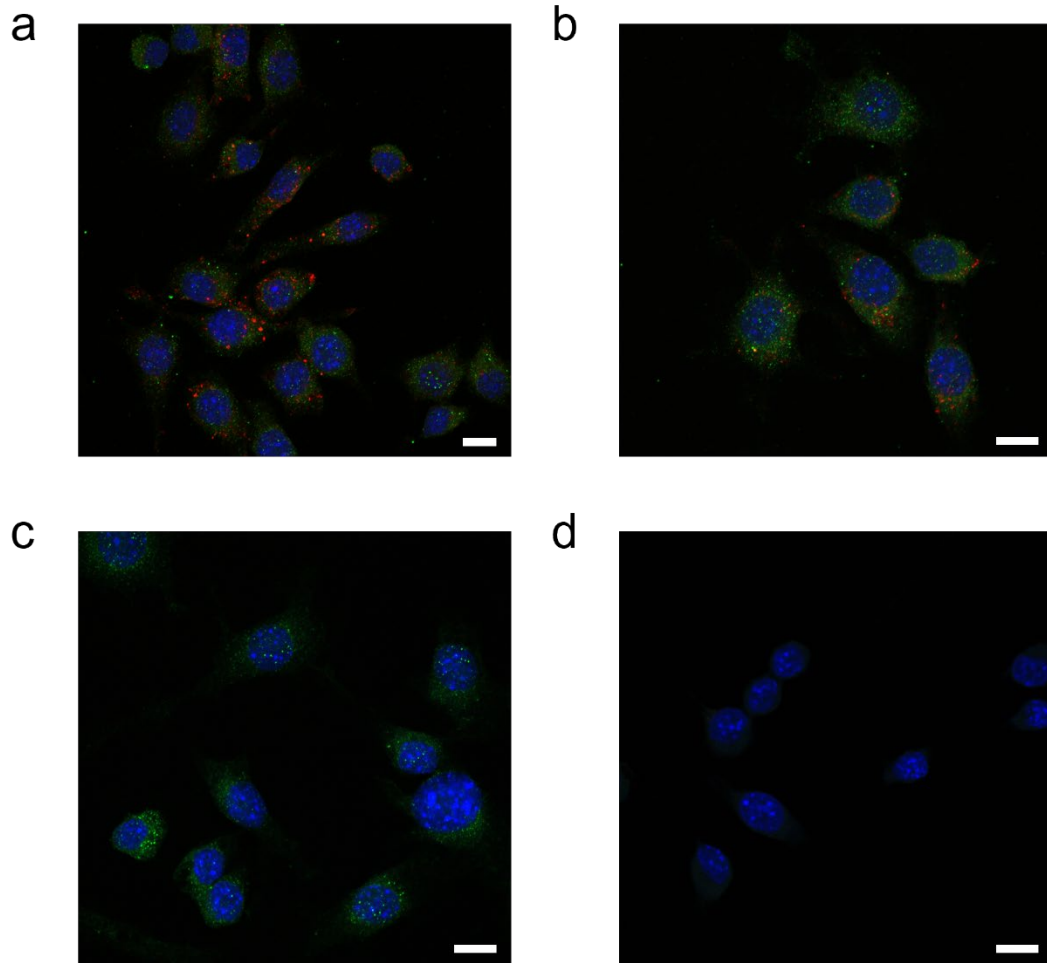

**Figure S1.** Supplementary confocal microscopy images of the uptake of Cy5-labelled disks by RAW 264.7 cell line. Nuclei stained with DAPI (blue), late endosome marker (RAB7) in green and Cy5-disks in red. Cells were treated with DNase I after uptake to remove DNA structures binding on cell surface and not taken up. Large (a) and small (b) overviews, endosome staining control (c), secondary antibody only control (d). Scale bars: 10  $\mu\text{m}$ .



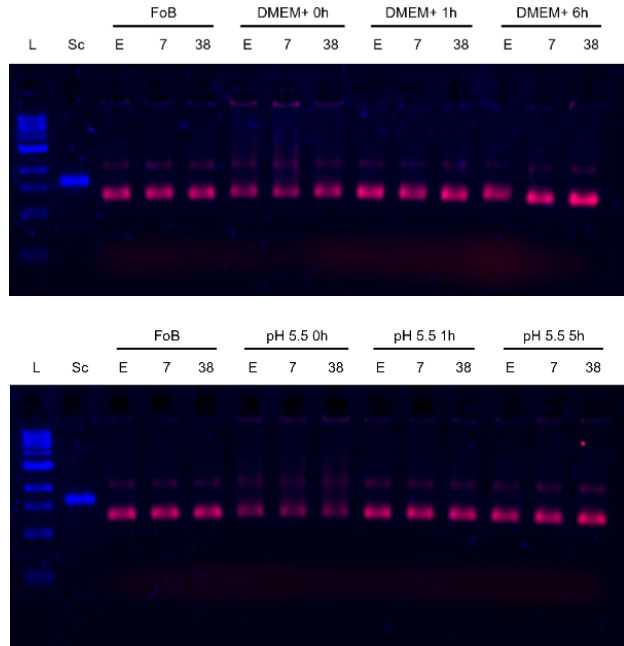

**Figure S2.** Stability assays by gel electrophoresis of Cy5-labelled DNA origami disks in DMEM+ and pH 5.5. SybrSafe signal in blue and Cy5 signal in red. Details of the protocol are reported in Materials and Methods. L: ladder 1kB, Sc: scaffold p7560; FoB: folding buffer; E: empty disk; 7: disk with CpG-ODNs at 7 nm spacing; 38: disk with CpG-ODNs at 38 nm spacing.

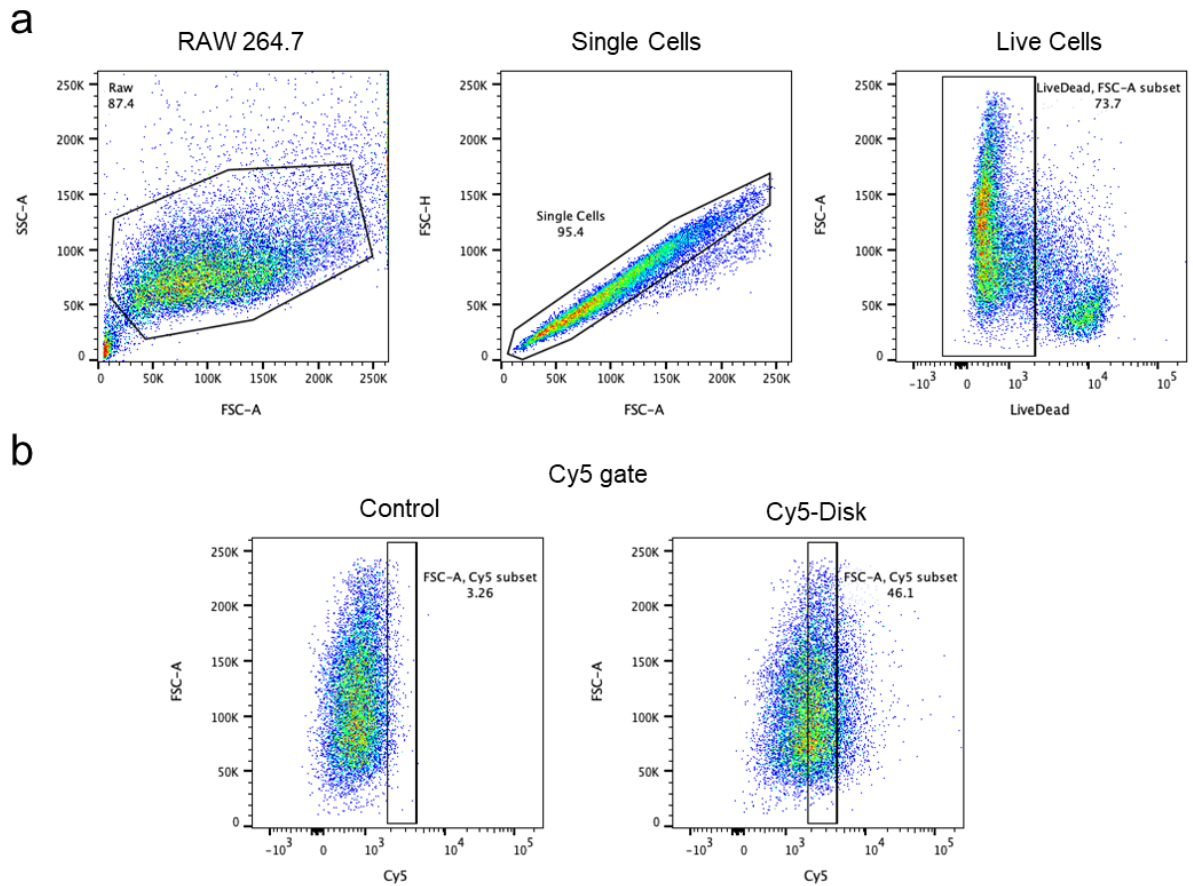

**Figure S3.** Gating strategy for flow cytometry activation assays. RAW 264.7 cells and single cells were gated at first. Subsequently, live cells were gated as negative for LiveDead staining. MFI values were calculated for this population when CD83 or CD40 is indicated. To normalize samples with DNA origami disk, MFI values were calculated in a population gated as represented here, to compare only cells with an intermediate restrict similar range of number of disks per cell. In this case, CD83 or CD40 in Cy5 gate is indicated.

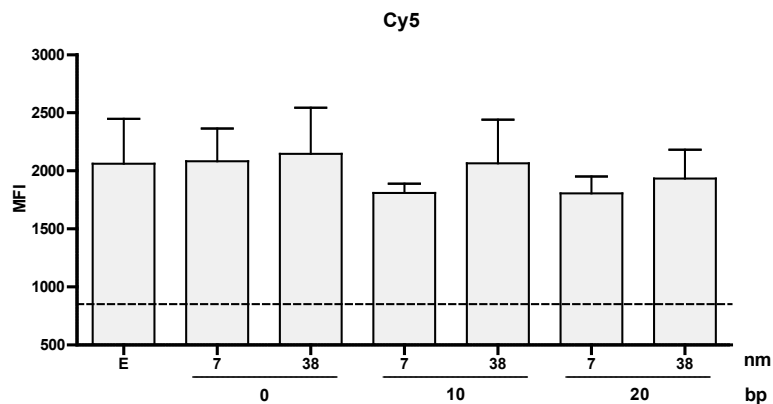

**Figure S4.** By flow cytometry, Cy5 MFI values for cells in the Live gate were measured to ensure no significant differences in uptake among disk samples. The dotted line indicates the background Cy5 level for unstained cells. Data represent the average and the standard deviation of the three biological replicates. Empty: empty disk; 7: disk with CpG-ODNs at 7 nm spacing; 38: disk with CpG-ODNs at 38 nm spacing; 0, 10 or 20 base pairs (bp) linkers.

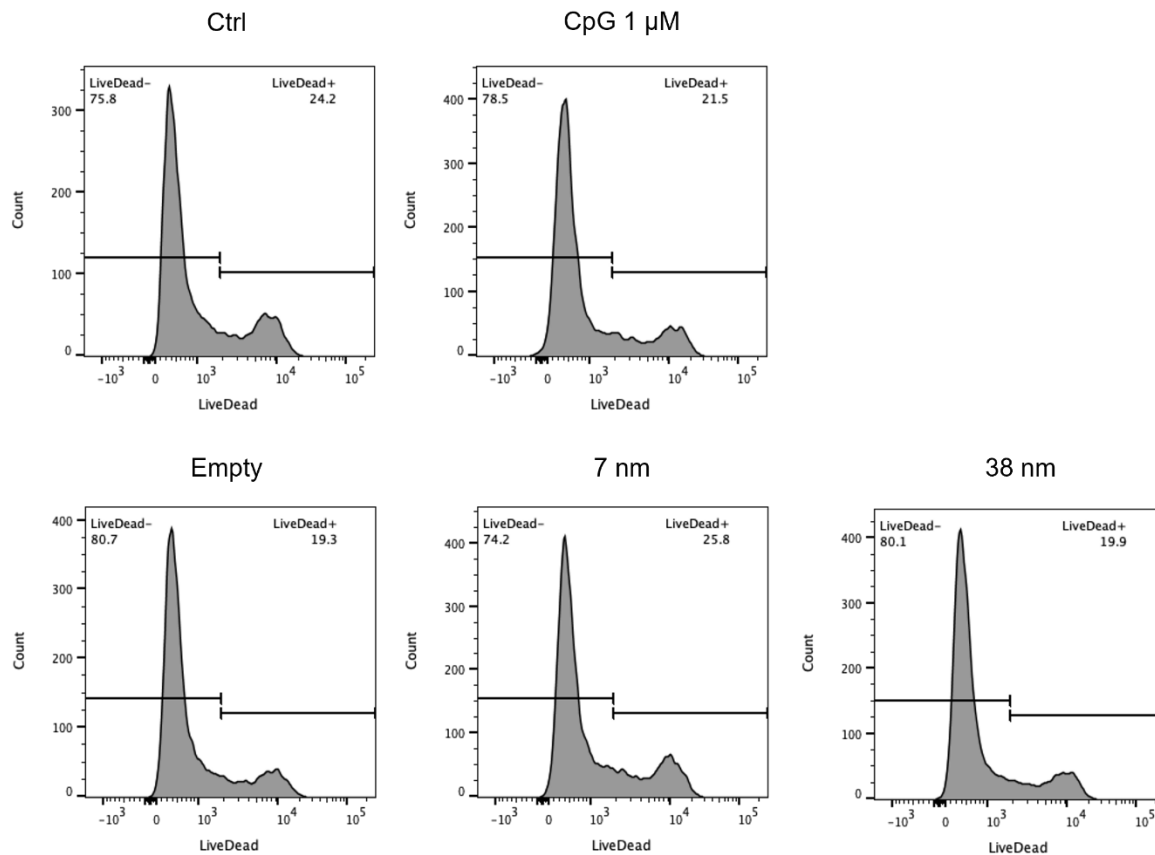

**Figure S5.** Histograms for representative samples of the LiveDead staining measured by flow cytometry. Percentages of negative and positive cells for LiveDead are reported in each plot. No significant differences in cell viability were observed among samples compared to the control. Empty: empty disk; 7 nm: disk with CpG-ODNs at 7 nm spacing; 38 nm: disk with CpG-ODNs at 38 nm spacing.

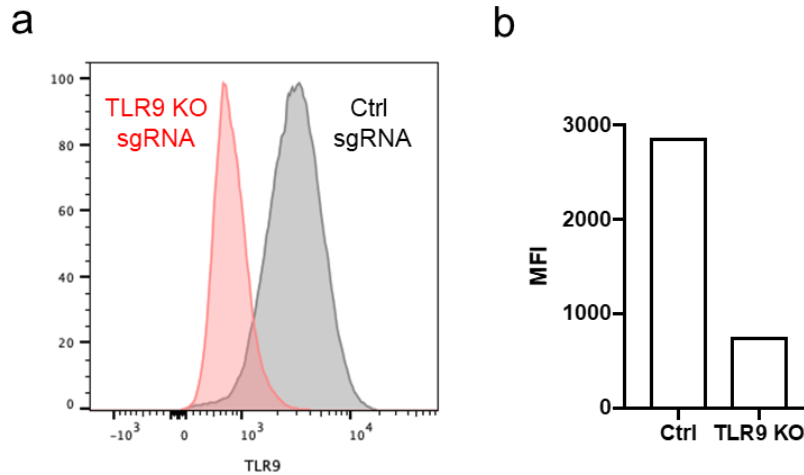

**Figure S6.** Characterization of TLR-9 knock-out (KO) RAW 264.7. Histograms (a) and MFI values (b) of TLR9 expression measured by flow cytometry. Details in Materials and Methods section.

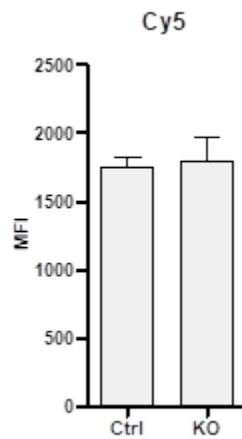

**Figure S7.** Quantitative analysis of uptake of Cy5-labelled disks (CpG at 7 nm) in standard (Ctrl) and TLR9-knock out (KO) RAW 264.7 cells. Cy5 MFI values for cells in the Live gate were measured by flow cytometry. Data represent the average and the standard deviation of the three biological replicates.

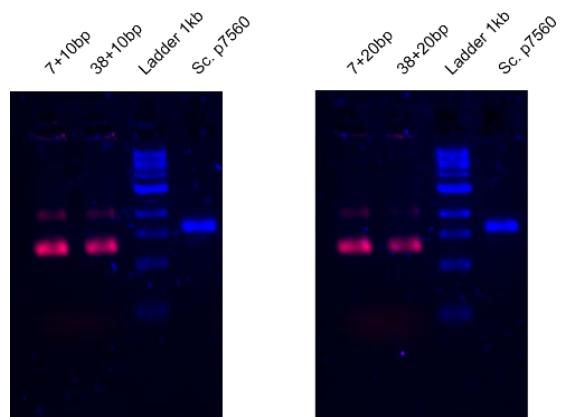

**Figure S8.** Analysis by agarose gel electrophoresis of purified Cy5-labelled DNA origami disks in folding buffer. SybrSafe signal in blue and Cy5 signal in red. 7+10bp(or 20bp): disk with CpG-ODNs at 7 nm spacing and 10(or 20) base pairs linker; 38+10bp(or 20bp): disk with CpG-ODNs at 38 nm spacing and 10(or 20) base pairs linker.

## SUPPLEMENTARY TABLES

**Table S1.** Scaffold p7560 sequence.

| <i>Sequence of scaffold p7560</i>                                                                                                                                                                                                                                                                                                                                                                                                                                                                                                                                                                                                                                                                                                                                                                                                                                                                                                                                                                                                                                                                                                                                                                                                                                                                                                                                                                                                                                                                                                                                                                                                                                                                                                                                                                                                                                                                                                                                                                                                                                                                                                                                                                                                                                                                                                                                                                                                                                                                                                                                                                                                                                                                                                                                                                                                                                                                                                                                                                                                                                                                                                                                                                                                                                                                                                                                                                                                                                                                                                                                                                                                                                                                                                                                                                                                                                                                                                                                                                                                                                                                                                                                                                                                                                                                           |
|-------------------------------------------------------------------------------------------------------------------------------------------------------------------------------------------------------------------------------------------------------------------------------------------------------------------------------------------------------------------------------------------------------------------------------------------------------------------------------------------------------------------------------------------------------------------------------------------------------------------------------------------------------------------------------------------------------------------------------------------------------------------------------------------------------------------------------------------------------------------------------------------------------------------------------------------------------------------------------------------------------------------------------------------------------------------------------------------------------------------------------------------------------------------------------------------------------------------------------------------------------------------------------------------------------------------------------------------------------------------------------------------------------------------------------------------------------------------------------------------------------------------------------------------------------------------------------------------------------------------------------------------------------------------------------------------------------------------------------------------------------------------------------------------------------------------------------------------------------------------------------------------------------------------------------------------------------------------------------------------------------------------------------------------------------------------------------------------------------------------------------------------------------------------------------------------------------------------------------------------------------------------------------------------------------------------------------------------------------------------------------------------------------------------------------------------------------------------------------------------------------------------------------------------------------------------------------------------------------------------------------------------------------------------------------------------------------------------------------------------------------------------------------------------------------------------------------------------------------------------------------------------------------------------------------------------------------------------------------------------------------------------------------------------------------------------------------------------------------------------------------------------------------------------------------------------------------------------------------------------------------------------------------------------------------------------------------------------------------------------------------------------------------------------------------------------------------------------------------------------------------------------------------------------------------------------------------------------------------------------------------------------------------------------------------------------------------------------------------------------------------------------------------------------------------------------------------------------------------------------------------------------------------------------------------------------------------------------------------------------------------------------------------------------------------------------------------------------------------------------------------------------------------------------------------------------------------------------------------------------------------------------------------------------------------------|
| AGCTTGGCACTGGCCGTCGTTTTACAACGTCGTGACTGGGAAAACCCTGGCGTTACCCAACCTTAATCGCCTTGCA<br>GCACATCCCCCTTCGCCAGCTGGCGTAATAGCGAAGAGGCCCGCACCGATCGCCCTTCCCAACAGTTGCGCAG<br>CCTGAATGGCGAATGGCGCTTTGCCTGGTTTTCCGGCACCAGAAGCGGTGCCGAAAGCTGGCTGGAGTGCATC<br>TTCCTGAGGCCGATACTGTCGTGTCGCCCTCAAACCTGGCAGATGCACGGTTACGATGCGCCCATCTACACCAAC<br>GTGACCTATCCCATTACGGTCAATCCGCCGTTTGTCCACGGAGAATCCGACGGGTTGTTACTCGCTCACATTT<br>AATGTTGATGAAAGCTGGCTACAGGAAGGCCAGACGCGAATTATTTTTGATGGCGTTCCTATTGGTTAAAAAAT<br>GAGCTGATTTAACAAAAATTTAATGCGAATTTAACAAAAATTAACGTTTACAATTTAAATATTTGCTTATACA<br>ATCTTCCTGTTTTGGGGCTTTCTGATTATCAACGGGGTACATATGATTGACATGCTAGTTTTACGATTACCGT<br>TCATCGATTCTTGTGTTGCTCCAGACTCTCAGGCAATGACCTGATAGCCTTTGTAGATCTCTCAAAAAATAGCTA<br>CCCTCTCCGGCATAATTTATCAGCTAGAACGGTTGAATATCATATTTGATGGTGATTGACTGTCTCCGGCCTTT<br>CTCACCTTTTGAATCTTACCTACACATTACTCAGGCATTGCATTTAAAATATATGAGGGTCTAAAAATTTTA<br>TCCTTGCCTTGAATAAAGGCTTCTCCCGCAAAGTATTACAGGGTCATAATGTTTTTGGTACAACCGATTAGC<br>TTTATGCTCTGAGGCTTTATTGCTTAATTTGCTAATTTCTTTGCCTTGCCTGTATGATTTATTGGATGTTAATGCTA<br>CTACTATTAGTAGAATTGATGCCACCTTTTCAGCTCGCGCCCCAAATGAAAATATAGCTAACAGGTTATTGACC<br>ATTTGCGAAATGTATCTAATGGTCAAACCTAAATCTACTCGTTCGCAGAATTGGGAATCAACTGTTATATGGAAT<br>GAAACTTCAGACACCGTACTTTAGTTGCATATTTAAAAACATGTTGAGCTACAGCATTATATTCAGCAATTAAGC<br>TCTAAGCCATCCGCAAAAAATGACCTCTTATCAAAGGAGCAATTAAGGTAAGTCTCTAATCCTGACCTGTTGGA<br>GTTTGCCTCCGGTCTGGTTTCGCTTTGAAGCTCGAATTAACCGCGATATTTGAAGTCTTTCGGGCTTCCTCTAAT<br>CTTTTTGATGCAATCCGCTTTGCTTCTGACTATAATAGTCAGGGTAAAGACCTGATTTTTGATTTATGGTCATTCT<br>CGTTTTCTGAACTGTTTAAAGCATTGAGGGGGATTCAATGAATATTTATGACGATTCCGCGAGTATTGGACGCTA<br>TCCAGTCTAACATTTTACTATTACCCCTCTGGCAAACCTTCTTTTGCAAAGCCTCTCGCTATTTTGGTTTTTA<br>TCGTCGTCTGGTAAACGAGGGTTATGATAGTGTGCTTACTATGCCTCGTAATTCCTTTTGGCGTTATGTATCT<br>GCATTAGTTGAATGTGGTATTCCTAAATCTCAACTGATGAATCTTTCTACCTGTAATAATGTTGTTCCGTTAGTTC<br>GTTTTATTAACGTAGATTTTTCTTCCCAACGTCCTGACTGGTATAATGAGCCAGTTCCTAAAAATCGCATAAGGTA<br>ATTCACAATGATTAAGTTGAAATTAACCATCTCAAGCCCAATTTACTACTCGTTCGGTGTTCCTCGTCAGGG<br>CAAGCCTTATTCACTGAATGAGCAGCTTGTGTACTGTTGGTAAATGAATATCCGGTCTTGTCGAAGATTAC<br>TCTTGATGAAGGTCAGCCAGCCTATGCGCCTGGTCTGTACACCGTTCATCTGCCTCTTCAAAGTTGGTCAGTT<br>CGGTTCCCTTATGATTGACCGTCTGCGCCTCGTTCGGGCTAAGTAACATGGAGCAGGTCGCGGATTTTCGACACA<br>ATTTATCAGGCGATGATACAAATCTCCGTTGACTTTGTTTCGCGCTTGGTATAATCGCTGGGGTCAAAGATGA<br>GTGTTTTAGTGTATTCTTTGCTCTTTTCGTTTTAGGTTGGTGCCTTCGTAGTGGCATTACGTATTTACCCGTTTA<br>ATGGAACCTTCTCATGAAAAAGTCTTTAGTCCCTCAAAGCCTCTGTAGCCGTTGCTACCCCTCGTCCGATGCTGT<br>CTTTGCTGCTGAGGGTGACGATCCCGCAAAGCGGCCTTTAACCCTGCAAGCCTCAGCGACCAATATATC<br>GGTTATGCGTGGGCGATGGTTGTGTCATTGTCGGCGCAACTATCGGTATCAAGCTGTTTAAAGAACTCACTCG<br>AAAGCAAGCTGATAAACCGATAACAATTAAGGCTCCTTTTGGAGCCTTTTTTTTTGGAGATTTTCAACGTGAAAA<br>AATTATTATTCGCAATTCCTTTAGTTGTTCCCTTTCTATTCTCACTCCGCTGAAACTGTTGAAAAGTTGTTTAGCAA<br>ATCCCATACAGAAAAATTCATTTACTAACGTCGAAAGACGACAAAACTTTAGATCGTTACGCTAACTATGAGG<br>GCTGTCTGTGGAATGCTACAGGCGTTGTAGTTGTACTGGTGACGAAACTCAGTGTTACGGTACATGGGTTCTTA<br>TTGGGCTTGCTATCCCTGAAAATGAGGGTGGTGGCTCTGAGGGTGGCGGTTCTGAGGGTGGCGGTTCTGAGGGT<br>GGCGGCTAAACCTCCTGAGTACGGTGATACACCTATCCGGGCTATACTTATATCAACCCTCTCGACGGCACT<br>TATCCGCTGGTACTGAGCAAACCCCGCTAATCCTAATCCTTCTTTGAGGAGTCTCAGCCTCTTAATACTTTC<br>ATGTTTCAGAATAAATAGGTTCCGAAATAGGCAGGGGGCATTAACTGTTTATACGGGCACTGTTACTCAAGGCAC<br>TGACCCCGTTAAAACTTATTACCAGTACACTCCTGTATCATCAAAAAGCCATGTATGACGCTTACTGGAACGGTA<br>AATTCAGAGACTGCGCTTTCCATTCTGGCTTTAATGAGGATTTATTTGTTTGTGAATATCAAGGCCAATCGTCTG<br>ACCTGCCTCAACCTCCTGTCAATGCTGGCGGCGGCTCTGGTGGTGGTTCTGGTGGCGGCTCTGAGGGTGGTGGCT<br>CTGAGGGTGGCGGTTCTGAGGGTGGCGGCTCTGAGGGAGGCGGTTCCGGTGGTGGCTCTGGTTCCGGTGATTTT<br>GATTATGAAAAGATGGCAAACGCTAATAAGGGGGCTATGACCGAAAATGCCGATGAAAACGCGCTACAGTCTG<br>ACGCTAAAGGCAAATGATTTCTGTCGCTACTGTTACTGGTGTCTGCTATCGATGGTTTCTATTGGTGACGTTTCCG<br>GCCTTCTAATGGTAATGGTGTACTGTTGTTGTTGCTAATTTGCTAATTTCCAAATGGCTCAAGTCGGTGACGGTG<br>ATAATTCACCTTTAATGAATAATTTCCGTCAATATTTACCTTCCCTCCCTCAATCGGTTGAATGTCGCCCTTTTGT<br>CTTTGGCGCTGGTAAACCATATGAATTTTCTATTGATTGTGACAAAAATAAATCTATTCCGTGGTGTCTTTGCGTTC<br>CTTTTATATGTTGCCACCTTTATGTATGATTTTCTACGTTTGCTAACATACTGCGTAATAAGGAGTCTTAATCAT<br>GCCAGTTCCTTTGGGATTTCCGTTATTATTGCGTTTCCCTCGGTTCTCTGGTAACTTTGTTCCGGCTATCTGCTTA<br>CTTTTCTAAAAAGGGCTTCGGTAAGATAGCTATTGCTATTTCAATGTTTCTTGCTCTTATTATTGGGCTAACTC |

AATTCTTGTGGGTTATCTCTCTGATATTAGCGCTCAATTACCCTCTGACTTTGTTTCAGGGTGTTCAGTTAATTCTC  
 CCGTCTAATGCGCTTCCCTGTTTTTATGTTATCTCTCTGTAAAGGCTGCTATTTTCATTTTTGACGTTAAACAAA  
 AAATCGTTTCTTATTTGGATTGGGATAAATAATATGGCTGTTTATTTTGTAAGTGGCAAATTAGGCTCTGGAAAAG  
 ACGCTCGTTAGCGTTGGTAAGATTGAGGATAAAATTGTAGCTGGGTGCAAAAATAGCAACTAATCTTGATTTAAG  
 GCTTCAAAAACCTCCCGCAAGTCGGGAGGTTTCGCTAAAACGCTCGCGTTCTTAGAATACCGGATAAGCCTTCTA  
 TATCTGATTTGCTTGTCTATTGGGCGCGTAATGATTCTACGATGAAAATAAAAACGGCTTGTTGTTCTCGATG  
 AGTGCGGTAAGTTGGTTAATACCCGTTCTTGGAAATGATAAGGAAAGACAGCCGATTATTGATTGGTTTCTACATG  
 CTCGTAAATTAGGATGGGATATTATTTTTCTTGTTCAGGACTTATCTATTGTTGATAAACAGGCGCGTTCTGCATT  
 AGCTGAACATGTTGTTTATTGTCGTCGCTGGACAGAATTACTTTACCTTTTGTGCGTACTTTATATTCTCTTATT  
 ACTGGCTCGAAAATGCCCTCTGCCTAAATTACATGTTGGCGTTGTTAAATATGGCGATTCTCAATTAAGCCCTACT  
 GTTGAGCGTTGGCTTTATACTGGTAAGAATTTGTATAACGCATATGATACTAAACAGGCTTTTTCTAGTAATTAT  
 GATTCGGGTGTTTATTCTTATTTAACGCCTTATTTACACCGTTCGGTATTTCAAACCATTAATTTAGGTGAGA  
 AGATGAAATTAACAAAATATATTGAAAAAGTTTTCTCGCGTTCTTGTCTTGCGATTGATTCGATCAGCATC  
 TTACATATAGTTATATAACCCAACCTAAGCCGGAGGTTAAAAAGGTAGTCTCTCAGACCTATGATTTTGATAAAA  
 TTCACTATTGACTCTTCTCAGCGTCTTAATCTAAGCTATCGCTATGTTTTCAAGGATTCTAAGGGAAAAATTAATT  
 AATAGCGACGATTACAGAAGCAAGGTTATTCACCTCACATATATTGATTTATGTACTGTTTCCATTAAAAAAGGT  
 AATTCAAATGAAATGTTAAATGTAATTAATTTGTTTTCTTGATGTTTGTTCATCATCTCTTTTGTCTCAGGTA  
 ATTGAAATGAATAATTCGCTCTGCGCGATTTTGTAACTTGGTATTCAAAGCAATCAGGCGAATCCGTTATTGTT  
 TCTCCCGATGTAAAAGGTAAGTACTGTTACTGTATATTCATCTGACGTTAAACCTGAAAATCTACGCAATTTCTTTATT  
 CTGTTTTACGTCAAATAATTTGATATGGTATGTTCTAACCTTCCATTATTTCAGAAGTATAACCAACAATC  
 AGGATTATATTGATGAATTGCCATCATCTGATAATCAGGAATATGATGATAATTCCGCTCCTTCTGGTGGTTTCT  
 TTGTTCCGCAAAAATGATAATGTTACTCAAACCTTTAAAAATTAATAACGTTTCGGGCAAAGGATTTAATACGAGTTG  
 TCGAATTGTTGTAAAGTCTAATACTTCTAAATCCTCAAATGTATTATCTATTGACGGCTCTAATCTATTAGTTGT  
 TAGTGCTCCTAAAGATATTTAGATAACCTTCTCAATTCCTTCAACTGTTGATTTGCCAACTGACCAGATATTG  
 ATTGAGGGTTTGATATTTGAGGTTGAGCAAGGTGATGCTTTAGATTTTTCATTTTGTGCTGGCTCTCAGCGTGGC  
 ACTGTTGCAGGCGGTAAATACTGACCGCCTCACCTCTGTTTTATCTTCTGCTGGTGGTTTCGTTCCGGTATTTTTA  
 ATGGCGATGTTTTAGGGCTATCAGTTCGCGCATTAAGACTAATAGCCATTCAAAAATATTGTCTGTGCCACGTA  
 TTCTTACGCTTTCAGGTCAGAAGGTTCTATCTCTGTTGGCCAGAATGTCCCTTTTATTACTGGTCTGTGACTGG  
 TGAATCTGCCAATGAAAATAATCCATTTGAGCGATTGAGCGTCAAATGTAGGTATTTCCATGAGCGTTTTTCC  
 TGTTGCAATGGCTGGCGTAATATTGTTCTGGATATTACCAGCAAGGCCGATAGTTTGAGTTCTTCTACTCAGGC  
 AAGTGATGTTATTACTAATCAAAGAAGTATTGCTACAACGGTAAATTTGCGTGATGGACAGACTCTTTTACTCGG  
 TGGCCTCACTGATTATAAAAACTTCTCAGGATCTGGCGTACCCTTCCGTCTAAAATCCCTTAATCGGCCT  
 CCTGTTTAGCTCCCGCTCTGATTCTAACGAGGAAAGCAGTTATACGTGCTCGTCAAAGCAACCATAGTACGCG  
 CCTGTAGCGCGCATTAAGCGCGGGGTGTGGTGGTTACGCGCAGCGTGACCGCTACACTGCCAGCGCCCT  
 AGCGCCCTCCTTTCGTTTTCTCCCTTCTCCTTCTCGCCACGTTTCGCGGCTTTCCTCCGCTCAAAGCTCAAATCGG  
 GGGCTCCCTTTAGGGTTCCGATTTAGTGCTTTACGGCACCTCGACCCCAAAAACTTGATTTGGGTGATGGTTCA  
 CGTAGTGGGCCATCGCCCTGATAGACGGTTTTTCGCCCTTTGACGTTGGAGTCCACGTTCTTTAATAGTGGACTC  
 TTGTTCCAAACTGGAACAACACTCAACCCTATCTCGGGCTATTCTTTTATTGATTTATAAGGGATTTTGCCGATTTG  
 GAACCACCATCAAACAGGATTTTCGCTGCTGGGGCAAACCAGCGTGGACCGCTTGCTGCAACTCTCTCAGGGC  
 CAGGCGGTGAAGGGCAATCAGCTGTTGCCGTTCTACTGGTAAAAAGAAAAACCACCCTGGCGCCCAATACGC  
 AAACCGCTCTCCCGCGCGTTGGCCGATTCAATTAATGAGCTGGCAGCAGGTTTCCCGACTGGAAAGCGGG  
 CAGTAGCGCAACAAATTAATGTGAGTTAGCTACTATTAGCCACCCAGGCTTACACTTTATGCTTCCGGC  
 TCGTATGTTGTGGAATTGTGAGCGGATAACAATTCACACAGGAAACAGCTATGACCATGATTACGAATTCG  
 AGCTCGGTACCCGGGATCCTCCGCTTTATCGAGGTAACAAGCACCGTAGCTTAAGCCCTGTTTACTCATT  
 CACCAACCAGGAGTTCAGAGTTCCGAGAAATGATTTATGTGAAATGCGTCAGCCGATTCAAGGCCCTATATTC  
 GTGCCACCGACGAGTTGCTTACAGATGGCAGGGCCGACTGTGCGGTATCATAGAGTCACTCCAGGGCGAGCGT  
 AAATAGATTAGAAGCGGGGTTATTTGGCGGGACATTGTCATAAGGTTGACAATTCAGCACTAAGGACACTTAA  
 GTCGTGCGCATGAATTCACAACCCTTAGAAGAATCCACCCTGGCTTCTCCTGAGAA

**Table S2.** Core folding staples. Cy5-functionalized sequences are reported in red. Sequence names correspond to the position of the staple in the caDNAno file.

| Name           | Sequence                         |
|----------------|----------------------------------|
| 13[140]46[140] | ACAATGTCTTCTAAATTACGCGCGACCT     |
| 17[56]14[66]   | CCCGAACGTTATCATTGAGGAATATCAAGCAA |
| 53[44]8[41]    | AAAATCAGTAGCCCATCAGCAAAAAA       |
| 48[118]15[118] | GAAACGCAAAGAACGACTTAAAGGAAT      |



|                |                                                    |
|----------------|----------------------------------------------------|
| 15[161]44[161] | GGGTTTTCTCTTCGTGAAAGAAGAGTAA                       |
| 15[88]48[77]   | GTCCGGTCAGAAAATACAATAGAACCTTCTTCGGAACCTCACAAT      |
| 36[107]23[118] | ATTATTAAGAATAAATCAAATAATATCCCGCTAATCGTATCAATA      |
| 5[130]56[119]  | TGTCGCTGGCAAGTGTAATAGCCCCCTCAGAG                   |
| 11[182]49[196] | CCCCGGGGTGACTCCCAACCTAAAACAAA                      |
| 36[118]27[118] | GCCAACAACGCTCAGTCTGAGGCTAAAT                       |
| 18[107]14[108] | CACGATCGCACACTAACCAGTTGAAGAG                       |
| 44[76]49[66]   | CACCCAATCCAAATAGCGCATAATAATACAAAGTTAAATTCAAGCG     |
| 28[151]22[150] | AAATATAATACTAAGCCTTCCTCATAGTAAAGATAATGCCGAGA       |
| 60[114]1[119]  | GATGATACAGGTGCCTTGAGTAACACCCAAATCCAACGT            |
| 17[140]42[140] | GGTGCCGCGTGGGATATGCGAAAGATTC                       |
| 18[128]44[119] | ATTCCGGCACGTTCTAAAATATCTGGCGCAGACGTAAC             |
| 1[120]58[119]  | CAAAGGCTATTAATCTGAAAGGGTTTT                        |
| 9[119]5[129]   | TTGCTGGTAATAACCCCGCTTGGGCGCCAGCAAGATCC             |
| 11[67]6[51]    | GGGTTTGACGTTCTTTGGTAAAAGCGCCAGAAAAGGGATTTTAGACAAAA |
| 23[77]36[55]   | TTCATTTAACCTTGCAGAAGCCAGTAATAAGAGAATATAAAGTACCGAAA |
| 48[170]53[186] | AAACCACTACTCTTAAAAGCCTTTTCCAGACTAACGATCTAAAGTTTAAA |
| 48[160]52[150] | CTAACGTAGAAAATAAACGGGTAGTTGCCAAAAAATTTC            |
| 27[140]33[154] | GACCCTGGTAGTAGTTGATTCCCAATAAA                      |
| 15[30]44[22]   | AAAAATCTAAAGAAACAATTACAGAGCGTCAAAAATGAAAATAAAA     |
| 52[97]55[87]   | AATAGCAAGGCCGGGACTGTAACCGCCTAGCC                   |
| 39[130]21[139] | AAGACCAAAAACGCGAGGCGTTCAATCAAAATATAAGC             |
| 29[72]28[72]   | AAAGCGAGAAAACTTTTCAAGCAAGACAAAGAACAAA              |
| 39[44]22[41]   | AAATGTTTCAGCTGATGAAACAAACAAA                       |
| 46[97]17[97]   | GATAACCCACCCTGAGATTAGATCGGCC                       |
| 21[140]38[140] | AAATATTTGGAGCAAGAGGGGAAATGCT                       |
| 25[140]34[140] | TTAGAACTATTTTATAATTGCCTTAGAG                       |
| 46[139]17[139] | GCTCCATATCATAAGGGGGATCGCTTCT                       |
| 5[98]2[105]    | TAACGTGCTTTCGCCGCTGCGAAGCGAAGGAGGGA                |
| 21[56]38[44]   | GAATACCAGAAGATAATGCAGACGACAATAAACAACAAAA           |
| 46[128]50[129] | CTTGATTAAGGGCAACATTTTCATGCAAC                      |
| 43[46]46[45]   | GTTTGTTTAAAGAATAATGAA                              |
| 42[65]19[76]   | ACACATATTATTTATCCTGCATCTCATATTC                    |
| 55[54]54[54]   | AAAAGCCACGAACCAAAA                                 |
| 40[160]23[160] | AACCCTCTAAAATGATTGCCTGGAGAGG                       |
| 42[197]43[197] | AAAATCTACAAAAA                                     |
| 23[161]37[175] | GTAGCTATGAGTAAGAACCAGACCGGAAA                      |
| 6[172]55[175]  | AAAGCTGATTGCTACCGTAACACTAAA                        |
| 9[140]50[140]  | CACAACAAAATTGTAAATCTCGCCGACA                       |
| 11[77]8[84]    | GGCCAACAGAGAATCGCTCATCACTTGCTGTAATC                |

|                |                                                   |
|----------------|---------------------------------------------------|
| 46[44]13[55]   | ATAAAAAGTAGCCAAAGGGAAGGTAAATAACGTGGCACATGCGCG     |
| 55[88]5[97]    | GCCTCAGACGTCATTAAGCCACCACCACACGCACGTA             |
| 0[140]60[115]  | AAACTATCATACGTGAACCATCAGTGCCCGAACCTATTTT          |
| 14[65]11[66]   | CAGAGCCCTAAAGCGTAAAAA                             |
| 16[45]12[45]   | TTACCATCACCCCAGCAGGTCTTTAAGAC                     |
| 40[55]43[45]   | AGAACGGGTATTAACCGTTTTCTTACCAGCCA                  |
| 30[137]27[129] | AAAATAACCTGTAAAGGTGATCCAATACCA                    |
| 34[165]38[150] | AAATCATTTTTGCGGATGGTCCTTTTAGGATTATCGAGCTCCCC      |
| 49[109]52[108] | TTGCGATATATAAAGGACGGA                             |
| 9[98]50[98]    | GAAGAAGTCAACAGAACAACTTCGGTC                       |
| 38[139]25[139] | TTAAACATATCGCGGGGTGAGAAAATTT                      |
| 58[128]61[144] | GCGCATGAAATATTTGCGGTATAAACAGTTAATGAAA             |
| 18[86]15[87]   | ATCCGACAGTAGCCGTCTCTG                             |
| 17[182]42[178] | CGCAACTATCAACATGGGAAGGTTAATAAAAC                  |
| 40[118]45[108] | AGATCCTAATTTACGGCTTATGTTTTGAGGTTTAACTCATTCTCAG    |
| 10[193]51[196] | AAACCGAGCTCGTCGGTTATCAGAAA                        |
| 19[172]14[171] | GCCTGAGCGACGCCATTTGCGGGCCCCAGTCTTTC               |
| 36[139]39[129] | CCAATCGCCATATTCTTCAAAGTTCAGAAAAG                  |
| 46[196]17[181] | AAAGTACAACGGAGATTTGTATTGAACGGCGATCGGCAGGCTG       |
| 25[77]34[65]   | AAAACATTTGGGTTTATGCGTACTAGAAAAAGCCTGTAAA          |
| 56[165]7[160]  | AAACGCCACCTACCCATGCCTTCACAGTGAGA                  |
| 54[139]58[129] | TAGCCATCTTTTCAATTTTCACGCCACCGGAATAGATTA           |
| 21[98]38[98]   | TGATAATGCATGTCACAAGAAAAAATC                       |
| 50[97]13[97]   | GCTGAGGGCAACGGTTCACATCGAACGA                      |
| 38[86]44[87]   | CTGTAGATAACAATCAAGCAAGCAATTAGTTGTAGTAAGCCC        |
| 24[172]19[171] | AAACCTTTTTGAAAGGCTATTGTTAATTTTTTATCTG             |
| 52[118]11[118] | GTTTCAGATTGCGATTACCGCCCTGGTT                      |
| 10[149]3[151]  | GTGTACGAGCTTAATTGTTTACCCGCCTGGGAAATCGTTATAAATGAAA |
| 15[77]44[77]   | ATCAATAAATAGATGAGAATTCGAGAAA                      |
| 23[41]24[51]   | AAAATCAAGAAAACAAAATTAACGCTATTAAAAA                |
| 46[118]49[108] | ACTGAGCGCTAATAAATACCCAAAGACAGGCT                  |
| 43[151]47[151] | AAGAAGAACCGAACTGAGAAATCCAGTAT                     |
| 50[196]13[181] | AAACTTGCTTTTCGAGGTGAATTGAAGGCATATGATAATTTACG      |
| 8[107]54[98]   | CGTGGGAGAGTTCTCGTTAGAATCCCACCACGAGCCAC            |
| 38[186]42[171] | AAACTGCGGAATCGTCATATGGATAGAGCAACATAATGCACTAA      |
| 50[128]9[139]  | CATTTTTTCAACAACCTTATTAGCGTTTGCCTCACTGAATTCCA      |
| 1[83]0[104]    | AAATAAAGCACTAAATCGGAACCCTAAACTCAAGTTT             |
| 11[161]48[161] | ACCTCGATGCGGCCCGTAATGCACTCAT                      |
| 36[175]35[165] | AAAAAGCAAACCTCAACAGGTGCGATAAGAGGAAA               |
| 10[58]52[44]   | ATCGAATTAGGGGATCGTCTTGACGGAAATTCTTGAGCTAAAA       |

|                |                                                    |
|----------------|----------------------------------------------------|
| 15[151]10[150] | GGTGGATGTTCCCGCCACTGTAAGACGTGGTCTGT                |
| 2[151]59[154]  | AAATTCCAGTTTGAGGCTGAGACTAAA                        |
| 47[152]15[160] | GTTAGCATTCCAGGGTAACGCCA                            |
| 33[76]29[104]  | AAAAAATAAGAATAAACACCTGCAAAAATTAATATATTTTAGT        |
| 44[118]19[118] | AAAGCTGTTTCAACATGGGATCCTGATT                       |
| 27[98]32[76]   | CCTCAGAGAATTAGCAACTAAACCGACCGTGTGATAAATAAGGCGTTAAA |
| 42[55]21[55]   | CCTGAATTATTTTCACCTTTTTTGCTTT                       |
| 5[140]54[140]  | TGGTTCCTGAGCAAGCCACGCCTG                           |
| 8[183]9[183]   | AAAAGTGCCCTGGGAAAA                                 |
| 25[98]34[98]   | TTAAGACCTTTTTACCAGTATTTTTAAA                       |
| 23[98]18[108]  | AATGGAAACAGTCCAAAACACTACAGAAAAATAAAGAATATAATAGGT   |
| 11[119]48[119] | GGTGTAATATAGGGAAGACTTTATAAAA                       |
| 19[182]41[196] | AGCCAGCGTTAAATAACGCCAAAAGGAAA                      |
| 44[160]19[160] | TCTTGACAACCTGGCCCCGTCGAAAAATA                      |
| 42[170]48[171] | CGGACCAGTCTTCATCAGGACAGACATCGCCAGCGATTACTA         |
| 44[86]51[87]   | TGAAACTGAACACAAGAGAGGAAATATTTTGGAGGGTACTTGCAGCACC  |
| 22[183]23[183] | AAAACACTACAGAGATAAAA                               |
| 32[154]31[137] | AAATCTGCGAACGAGTAGATTTCAAAA                        |
| 27[119]32[111] | CGGTTGTAAATCATAAGTTTCCCATTAGATATGGTT               |
| 3[72]56[77]    | AAACGGCGAACGGCTTAATTAATCCATTGGCC                   |
| 56[76]7[76]    | TTGATATGCCACCAGCCGATTATCCTGA                       |
| 46[55]17[55]   | GAAACAACATAAAAGTATTAGTCCTTTG                       |
| 7[77]5[87]     | GAAGTGTTTTTAAAGAGCTAATTGA                          |
| 27[62]24[87]   | AAAGTAAATGCTGATGCAAATCCAATCGCGCTTAGGAGCGATAAGTG    |
| 42[177]21[193] | GAAGATACATCAGCTCAAATTCGCATTAAATTTAAA               |
| 38[97]25[97]   | AGGTCTTATTGCATATATGTGGCTTAGA                       |
| 52[107]7[118]  | GTGGCATTTTTGAACCACAGAGCCGCCGACCGCTGGTGCGGTTT       |
| 19[30]40[22]   | AAAGGAACAAAGGAGAAACAAGCAAGACCAAGTACCGCACTCAAAA     |
| 5[88]2[72]     | CGACCGCCGCTGGCGAGGCTTGACGGGGAAAGCAAA               |
| 21[30]16[46]   | AAATAACGGATTTCGCTGAACATCGGAAACCACAACATTATATTAAAACT |
| 20[66]42[56]   | ACAGTTATCATGCTAATTTTAAAAGAAACAGCATTTTAT            |
| 14[107]46[98]  | ATAAAACAGAATAACGGTCAGAGA                           |
| 8[83]52[77]    | AGTGAGGAGCGTCAAAACGTC                              |
| 19[161]40[161] | ATTCGCGACCAATAATTC AACCTATCAT                      |
| 58[107]3[118]  | GGCCATACATGGCTTATAGAACGTAGGAGCG                    |
| 19[77]40[77]   | CTGATTATAACGTCCCAATATAATCGG                        |
| 29[105]26[108] | TAATTTTAGGCAAAGCATAAAAGAC                          |
| 7[119]52[119]  | GCGTATTTCCAGTCAGCCCCCTTCAACA                       |
| 21[77]18[87]   | CGCAGAGGCGAATATCAGGTTTCAGATGGCGC                   |
| 15[182]45[196] | TGTAAAAGGAAGGGTGTACAGACCAGAAA                      |

|                |                                                     |
|----------------|-----------------------------------------------------|
| 27[130]34[119] | AAAGATCAAAATCATAGACAGTAGATAATGC                     |
| 52[149]57[165] | TGTAGACAGCAACTACAAATAGGACAGAACCTCAGGAGGTTTAGTACAAA  |
| 52[76]11[76]   | ACCAATGAAAATCACCTACATACATTCT                        |
| 7[161]52[161]  | CGGGCAATGAGCTAGTTAGCGGTTAGTA                        |
| 15[119]12[129] | TGAGGAAGGTTAGCTGAATTCTTGCAAGCAC                     |
| 58[97]60[86]   | TGGAATGGAAAGCGATTTACCTAAAA                          |
| 54[97]9[97]    | CACCGGAGCGCGTTGCATTAAGTACGAGTA                      |
| 40[196]39[186] | AAAAATTACGAGGCATAGTAAGCGTCCAATAAAA                  |
| 4[162]5[162]   | AAAAATCCCGCAAAAAA                                   |
| 38[149]43[150] | CTCGTAATAGGTTTACCTTTAGGAAGGTAGATTTT                 |
| 58[154]5[139]  | AAACCTCAAGAGAAGGATTAGGGTGTATCAATAGCCTTGATGG         |
| 29[120]33[129] | AGCTGATTAGCTAATTTTCGCAAAATGGTAGTTGAATTC             |
| 5[62]6[81]     | AAAGGCGCGTACTATGGTTGCTACA                           |
| 57[65]4[62]    | AAAACAAACAAAGCGCCGCTACAGAAA                         |
| 56[118]58[108] | CCCAGCATTGACAGGGGTTGAACCA                           |
| 19[119]40[119] | GTTTGGACACGTAATCTAAGATAGCGAG                        |
| 14[170]7[172]  | TCTACTAATCTCCGACAGTAAAGACAATCATGGTAAAGCTAATGAGCAAAA |
| 34[118]29[119] | TGTAGCTTGTCTGGACAGGCAGGGGCGCG                       |
| 25[51]20[67]   | AAATTAATTTTCCCTTAGAAAATCGTTTACATTGAGCAAAAAGTTACTAT  |
| 34[97]38[87]   | TAGGAATCATAATTTATACAATTCGAGCAAAGCGGTACC             |
| 13[182]47[196] | CTCGCCCCGCCAGTGCAGCAAACAAAAA                        |
| 2[104]58[98]   | GCCCCGTAAGCGTGGATAAG                                |
| 9[41]10[59]    | AAATTAACCGTTGTAGCAATACCTCA                          |
| 32[110]36[108] | TGAAATAGTACGGCAACATGAAAGCCATGTA                     |
| 34[139]29[151] | CTTAATTATAACAGCATTAAACGCATCAATTCTACTAAAAA           |
| 38[76]42[66]   | TATCTGTCCAGACGAACGCGCTCCTTATGAATCATAGCT             |
| 13[56]46[56]   | AACTGATTGCCACGAGCCGAAAGAGCAA                        |
| 42[97]21[97]   | AATCAAGAATCAGATAGATTTCCCCGGT                        |
| 61[86]0[83]    | AAAAGTTTTAACGTCGAGGTGCCGAAA                         |
| 19[140]15[150] | AATGGAAGGTTTCGATTCTGAAACCAGCCAGCTGTTG               |
| 49[67]56[65]   | AAACTTTTGAGCCAGCAAACCATTCAAGTTACCCTCACCTCAGATCAAA   |
| 26[162]27[162] | AAAAGGGAGTTTGCAAAA                                  |
| 0[103]60[100]  | TTTGGGGGGGTCAGAGTG                                  |
| 23[119]36[119] | TGATATTGGAGACACGAAAGATAACAAC                        |
| 40[76]23[76]   | CTGTCTTCTGTTAATTACCTTAACAAT                         |
| 48[76]15[76]   | CAATAGAACCAGAAACCGCCTACCCTCA                        |
| 31[100]30[100] | AAACTGACCTAAATTTAACTATTTTCATTCATCTTAAA              |
| 35[65]26[62]   | AAATTAGTATCAATATAACTATATAAA                         |
| 50[139]13[139] | ATGACAAAGGAAGTTCGGTGGCCTTATG                        |
| 22[128]18[129] | CGAAAAGATTGTTATTTGTTATACTGCGG                       |

|                |                                                 |
|----------------|-------------------------------------------------|
| 42[139]46[129] | ATTTAGCGAACCTCATTGTGACAAATCAACGGTCAGTTA         |
| 52[160]11[160] | AATGAATAAGGCTCCTGTTTCGCTTGTT                    |
| 11[30]48[22]   | AAAGGCAGATTCATTTTTGGAGGGAGACAAAAGGGCGACATTA AAA |
| 59[75]58[75]   | AAAATCTGACAGTCAAAA                              |
| 42[160]68[149] | TTATTACATAACCACGGAACGCTAAACGT                   |
| 46[76]72[65]   | TAAGCCCTAGACGGAATACATGTTTGAG                    |
| 52[186]78[171] | AAATGTCGTCTTAATTGTAAATTCGTGGAGGAT               |
| 50[160]76[149] | ATACCGATAAAAATACTGCCATAAATAAC                   |
| 60[99]86[87]   | TACTGGTAAGTTCCAGATTTAGAAAAGGAA                  |
| 54[160]80[149] | CAGTACACCTCATAACTCACACGGAAGC                    |
| 44[97]70[87]   | AAGGCTTATTGGGCTAGATGGATGGCAA                    |
| 50[118]76[108] | GCATAACAGGACTAGCCTTGATCCTTAG                    |
| 51[88]78[87]   | ATTACCATAGGGAAAAACATTTCT                        |
| 56[97]82[87]   | AGGCAGGACCAGAAAGAGCGGTCGGCCA                    |
| 33[130]62[129] | CATGCTGAATGGCTTAATTGAGTTACGCAAGACATTAT          |
| 45[109]72[108] | AGGGTAATGATTAGGAGCTCCAGC                        |
| 38[118]64[108] | AATGACCGGAAGCCGTCAAATAGAGTCA                    |
| 54[118]80[107] | AATCACCCGGTCATGGGAAACATCGGCC                    |
| 52[55]78[44]   | AGCACCGCATTTGGGTCTGAAACACGAC                    |
| 48[97]74[87]   | ATAAGTTCGCAATAGGTGAGGAGTTGGC                    |
| 52[139]78[128] | TTTGCTAACGTTGATATCCGCACAGGGC                    |
| 44[181]70[171] | GCTGACCAGGACGTTTAAATGTTCCCTGT                   |
| 60[144]86[127] | AAACCCCTGCCGTATTAAGGAACAAATAGGGT                |
| 36[97]62[87]   | AGGCATTATTCTTAACCTCCGAATAAAG                    |
| 38[160]64[150] | ATTGAATTCAAAGCTGTGTAGTATTTTA                    |
| 44[55]70[44]   | GATTTTTACAAAATTTTGAGTCAGAAGG                    |
| 54[76]80[65]   | AGCCGCTGCCTTTCCACCGAATTAGTA                     |
| 48[139]74[128] | TAAAGGTACTCCTTGTGGTTGTGCAAGG                    |
| 46[160]72[149] | TTGTGTCCCAACTTCTATTACGGCAAAG                    |
| 58[118]84[107] | GCTCAGTTATAAGTGCGGTCACCCAGCA                    |
| 48[55]74[44]   | TACCAGCAGCAGATCTGAGAGTTGCTGA                    |
| 42[76]68[65]   | TGCACCCTACCGCGAGATGAAAAAATCG                    |
| 37[55]64[65]   | AAAACAAAAGGTAAAGTAATGTCTTCTGTATCCTTG            |
| 44[139]70[129] | CATTACCATTACCTACAAACGCTCTGAAT                   |
| 40[139]66[129] | GATAAAATTTTGCCAACAAGATCTAGCT                    |
| 56[139]82[128] | TCAGAACGGGATAGAGAGTTGAGGGTGG                    |
| 40[97]66[87]   | TAGAAACGTCTGAAATCATACTTTTTT                     |
| 50[76]76[65]   | AAGCCGGACAGCAGACCTGAAAACATC                     |
| 42[118]68[107] | GCGGGAGCCGGTATAACAGAAGCCCCAA                    |
| 48[181]74[171] | AGAATACATACCAAGCCAAGCACGACGT                    |

|                      |                                        |
|----------------------|----------------------------------------|
| 17[30]71[46]         | AAAGACAACCTCGTCATTTTCTAATTTACGCTAA     |
| 13[30]75[46]         | AAATGGCTATTACAAATGATTTTAAGGCAATAG      |
| 9[77]79[87]          | ATAACATGGAAATACCAGTAGGGAGTTA           |
| 15[140]73[150]       | CGATTAAGGCGAAAGGGAACCGGATATT           |
| 13[119]75[130]       | TGCTGAAATGCGCACTGGCATAGCCGGA           |
| 12[44]79[46]         | AATACCAGTCATGGATTATTTACATCACCGAATTCATT |
| 48[196]77[193]       | AAAGAAAGAGGCAAA                        |
| 54[175]83[172]       | AAAGAGTTTCGTCAC                        |
| 12[128]79[130]       | GAATGAGTAATCTCCAGAACAATAATAAACGCCCCAC  |
| 7[98]81[109]         | ACGCGCGGCCAGCTTTCATCGAGAATAG           |
| 22[149]69[150]       | GTCTAAATTGCAAGAACCTACCATGTTGAGAAGACGAC |
| 3[98]85[109]         | GGGAAGACGTAACCGTCGAGAGAGGTTG           |
| 3[140]85[151]        | TGAGTGTTCAAAAAGACCGTACGCCACCC          |
| 15[98]73[109]        | AAATCAAACTAATAACAAAGAGTGAAT            |
| 15[56]73[66]         | ACCTCAATTTAGAAACAGGGAAAGAAAC           |
| 44[196]73[193]       | AAAGCGCATAGGCTG                        |
| 13[77]75[87]         | GCCATTATATTAACGGAAACCATTGAGT           |
| 26[107]65[109]       | TACGCTGAGACAACATAAATCAATCAAAAAGTAGGCAG |
| 23[140]65[151]       | GATAAATTTCAAAAATTTAATGAGAGTA           |
| 6[80]83[87]          | GGAGCCCTCAGCCCTCAG                     |
| 19[56]69[66]         | AGCGGAATAACAGTATCGTAGCATTCCA           |
| 13[161]75[171]       | CCCGCTTGGAGAAGGACCCCTGATAAA            |
| 9[161]79[171]        | ATAAAGTGTCATAGCAAAAGGCAGCTTG           |
| 21[119]67[130]       | AAACAGGTGAACGGTTTTGCAAAACGAG           |
| 24[86]67[87]         | AATGAATTACTGTTATTCATTTTCATCAACAACTATTA |
| 21[161]67[171]       | TAATATTTAGGTCCTTTAGACAATATTC           |
| 11[56]77[67]         | CAGTAATAGAATACCCTCAGCTATGGTT           |
| 7[51]81[68]          | AAAGGAACGGTAAGTCTGTGACAGAACGATAGC      |
| 7[140]81[150]        | TTTTTCTCGTTGCGATTCCACATGGGAT           |
| 19[98]69[109]        | TTCATCAAATTGCGTATAGAAGAGCATG           |
| 17[77]71[87] + Cy5   | GGGACGAGTAACCGAGAACGAGCTATTT/3Cy5Sp/   |
| 11[140]77[150] + Cy5 | TTAAGCTCAACTCGTTCCATTACATACA/3Cy5Sp/   |
| 11[98]77[109] + Cy5  | CCGAACCTGACGCATCTACAGACCACGGA/3Cy5Sp/  |
| 5[119]83[130] + Cy5  | GGCGAAACGGTCCACACCCTCTAATCAA/3Cy5Sp/   |
| 17[161]71[171] + Cy5 | CGCCATTGTAACAATCATTATAACAACA/3Cy5Sp/   |
| 17[119]71[130] + Cy5 | CAGCTTTGACCGTATTTAATCCCAGCTT/3Cy5Sp/   |

**Table S3.** CpG-functionalized and extra folding staples. Sequence names correspond to the position of the staple in the caDNA file. \* indicates a phosphorothioate bond.

Note: in all cases, CpG-ODNs (with and without linkers) are directly conjugated to staples forming the DNA origami disk structures. They are therefore “integrated” in the structure core to avoid loss of active molecules. A double strand configuration for the linkers is then introduced by base-pairing with a complementary sequence (anti-linker) to a single strand linker among staple and CpG-ODN sequences.

| <i>Disk type</i>         | <i>Name</i>                 | <i>Sequence</i>                                                                            |
|--------------------------|-----------------------------|--------------------------------------------------------------------------------------------|
| Empty                    | 3[119]1[140]                | GGCGCTAGGGCGAGGAGTCCAGCGAAAAACCGTAAA                                                       |
| Empty                    | 25[119]22[129]              | ATAGTGAATTTATAAAAAGGCCCAACCGTGAAT                                                          |
| Empty                    | 17[98]42[98]                | TCAGGAAGTTGGTGTGAGATAGCCTTA                                                                |
| Empty                    | 13[98]8[108]                | ACCACCAGCAGATGATCGGCTCTGACCTCAGCCATTCAAACCTCTGT                                            |
| 7 nm CpG                 | 3[119]1[140]                | GGCGCTAGGGCGAGGAGTCCAGCGAAAAACCGTAAA                                                       |
| 7 nm CpG                 | 25[119]22[129]              | ATAGTGAATTTATAAAAAGGCCCAACCGTGAAT                                                          |
| 7 nm CpG                 | CpG1826 +<br>13[98]8[108]   | T*C*C*A*T*G*A*C*G*T*T*C*C*T*G*A*C*G*T*TACCACCAGCAGATGATCG<br>GCTCTGACCTCAGCCATTCAAACCTCTGT |
| 7 nm CpG                 | CpG1826 +<br>17[98]42[98]   | T*C*C*A*T*G*A*C*G*T*T*C*C*T*G*A*C*G*T*TTACAGGAAGTTGGTGTGATAGCCTTA                          |
| 38 nm CpG                | 17[98]42[98]                | TCAGGAAGTTGGTGTGAGATAGCCTTA                                                                |
| 38 nm CpG                | 13[98]8[108]                | ACCACCAGCAGATGATCGGCTCTGACCTCAGCCATTCAAACCTCTGT                                            |
| 38 nm CpG                | CpG1826 +<br>25[119]22[129] | T*C*C*A*T*G*A*C*G*T*T*C*C*T*G*A*C*G*T*TATAGTGAATTTATAAAAAG<br>GCCCAACCGTGAAT               |
| 38 nm CpG                | CpG1826 +<br>3[119]1[140]   | T*C*C*A*T*G*A*C*G*T*T*C*C*T*G*A*C*G*T*TTGGCGCTAGGGCGAGGAG<br>TCCAGCGAAAAACCGTAAA           |
| 7 nm CpG<br>+10bp linker | 3[119]1[140]                | GGCGCTAGGGCGAGGAGTCCAGCGAAAAACCGTAAA                                                       |
| 7 nm CpG<br>+10bp linker | 25[119]22[129]              | ATAGTGAATTTATAAAAAGGCCCAACCGTGAAT                                                          |

|                           |                                            |                                                                                                                |
|---------------------------|--------------------------------------------|----------------------------------------------------------------------------------------------------------------|
| 7 nm CpG<br>+10bp linker  | CpG1826 + 10<br>LINKER +<br>13[98]8[108]   | T*C*C*A*T*G*A*C*G*T*T*C*C*T*G*A*C*G*T*TCCATAGACTAACCACCAG<br>CAGATGATCGGCTCTGACCTCAGCCATTCAAACCTCTGT           |
| 7 nm CpG<br>+10bp linker  | CpG1826 + 10<br>LINKER +<br>17[98]42[98]   | T*C*C*A*T*G*A*C*G*T*T*C*C*T*G*A*C*G*T*TCCATAGACTATCAGGAAG<br>TTGGTGTGAGATAGCCTTA                               |
| 7 nm CpG<br>+10bp linker  | anti-linker10                              | TAGTCTATGG                                                                                                     |
| 38 nm CpG<br>+10bp linker | 17[98]42[98]                               | TCAGGAAGTTGGTGTGAGATAGCCTTA                                                                                    |
| 38 nm CpG<br>+10bp linker | 13[98]8[108]                               | ACCACCAGCAGATGATCGGCTCTGACCTCAGCCATTCAAACCTCTGT                                                                |
| 38 nm CpG<br>+10bp linker | CpG1826 + 10<br>LINKER +<br>25[119]22[129] | T*C*C*A*T*G*A*C*G*T*T*C*C*T*G*A*C*G*T*TCCATAGACTAATAGTGAA<br>TTTATAAAAGGCCCAACCGTGAAT                          |
| 38 nm CpG<br>+10bp linker | CpG1826 + 10<br>LINKER +<br>3[119]1[140]   | T*C*C*A*T*G*A*C*G*T*T*C*C*T*G*A*C*G*T*TCCATAGACTAGGCGCTAG<br>GGCGAGGAGTCCAGCGAAAAACCGTAAA                      |
| 38 nm CpG<br>+10bp linker | anti-linker10                              | TAGTCTATGG                                                                                                     |
| 7 nm CpG<br>+20bp linker  | 3[119]1[140]                               | GGCGCTAGGCGAGGAGTCCAGCGAAAAACCGTAAA                                                                            |
| 7 nm CpG<br>+20bp linker  | 25[119]22[129]                             | ATAGTGAATTTATAAAAGGCCCAACCGTGAAT                                                                               |
| 7 nm CpG<br>+20bp linker  | CpG1826 + 20<br>LINKER +<br>13[98]8[108]   | T*C*C*A*T*G*A*C*G*T*T*C*C*T*G*A*C*G*T*TATAGACTAGCAACTTTCA<br>CCACCACCAGCAGATGATCGGCTCTGACCTCAGCCATTCAAACCTCTGT |
| 7 nm CpG<br>+20bp linker  | CpG1826 + 20<br>LINKER +<br>17[98]42[98]   | T*C*C*A*T*G*A*C*G*T*T*C*C*T*G*A*C*G*T*TATAGACTAGCAACTTTCA<br>CCTCAGGAAGTTGGTGTGAGATAGCCTTA                     |
| 7 nm CpG<br>+20bp linker  | anti-linker20                              | GGTGAAAGTTGCTAGTCTAT                                                                                           |
| 38 nm CpG<br>+20bp linker | 17[98]42[98]                               | TCAGGAAGTTGGTGTGAGATAGCCTTA                                                                                    |
| 38 nm CpG<br>+20bp linker | 13[98]8[108]                               | ACCACCAGCAGATGATCGGCTCTGACCTCAGCCATTCAAACCTCTGT                                                                |
| 38 nm CpG<br>+20bp linker | CpG1826 + 20<br>LINKER +<br>25[119]22[129] | T*C*C*A*T*G*A*C*G*T*T*C*C*T*G*A*C*G*T*TATAGACTAGCAACTTTCA<br>CCATAGTGAATTTATAAAAGGCCCAACCGTGAAT                |
| 38 nm CpG<br>+20bp linker | CpG1826 + 20<br>LINKER +<br>3[119]1[140]   | T*C*C*A*T*G*A*C*G*T*T*C*C*T*G*A*C*G*T*TATAGACTAGCAACTTTCA<br>CCGGCGCTAGGCGAGGAGTCCAGCGAAAAACCGTAAA             |
| 38 nm CpG<br>+20bp linker | anti-linker20                              | GGTGAAAGTTGCTAGTCTAT                                                                                           |
| free CpG                  | CpG 1826                                   | T*C*C*A*T*G*A*C*G*T*T*C*C*T*G*A*C*G*T*T                                                                        |



## REFERENCES

- (1) Hahn, J.; Wickham, S. F. J.; Shih, W. M.; Perrault, S. D. Addressing the Instability of DNA Nanostructures in Tissue Culture. *ACS Nano* **2014**, *8* (9), 8765–8775. <https://doi.org/10.1021/nn503513p>.
- (2) Eklund, A. S.; Comberlato, A.; Parish, I. A.; Jungmann, R.; Bastings, M. M. C. Quantification of Strand Accessibility in Biostable DNA Origami with Single-Staple Resolution. *ACS Nano* **2021**, *15* (11), 17668–17677. <https://doi.org/10.1021/acsnano.1c05540>.
- (3) Wagenbauer, K. F.; Engelhardt, F. A. S.; Stahl, E.; Hecht, V. K.; Stömmner, P.; Seebacher, F.; Meregalli, L.; Ketterer, P.; Gerling, T.; Dietz, H. How We Make DNA Origami. *ChemBioChem* **2017**, *18* (19), 1873–1885. <https://doi.org/10.1002/cbic.201700377>.
- (4) Nüssing, S.; House, I. G.; Kearney, C. J.; Chen, A. X. Y.; Vervoort, S. J.; Beavis, P. A.; Oliaro, J.; Johnstone, R. W.; Trapani, J. A.; Parish, I. A. Efficient CRISPR/Cas9 Gene Editing in Uncultured Naive Mouse T Cells for In Vivo Studies. *J.I.* **2020**, *204* (8), 2308–2315. <https://doi.org/10.4049/jimmunol.1901396>.
- (5) Ponnuswamy, N.; Bastings, M. M. C.; Nathwani, B.; Ryu, J. H.; Chou, L. Y. T.; Vinther, M.; Li, W. A.; Anastassacos, F. M.; Mooney, D. J.; Shih, W. M. Oligolysine-Based Coating Protects DNA Nanostructures from Low-Salt Denaturation and Nuclease Degradation. *Nat Commun* **2017**, *8* (1), 15654. <https://doi.org/10.1038/ncomms15654>.
